# Supplementary material
Source: PubMed Central journal article supplement (PMC6232679)
Supplement: NIHMS995400-supplement-1.pdf [file NIHMS995400-supplement-1.pdf]

**Appendix****Supplemental Table 1**

Distribution of pollutant concentrations by exposure windows

| Pollutants                             | 3 months' preconception |       |       | Trimester 1 |       |       | Trimester 2 |       |       | Whole pregnancy |       |       |
|----------------------------------------|-------------------------|-------|-------|-------------|-------|-------|-------------|-------|-------|-----------------|-------|-------|
|                                        | Min                     | Max   | IQR   | Min         | Max   | IQR   | Min         | Max   | IQR   | Min             | Max   | IQR   |
| CO (ppm)                               | 0.17                    | 1.13  | 0.26  | 0.18        | 1.10  | 0.26  | 0.18        | 1.10  | 0.26  | 0.22            | 1.05  | 0.21  |
| NO <sub>x</sub> (ppb)                  | 5.09                    | 92.97 | 28.51 | 5.51        | 89.62 | 30.21 | 5.77        | 90.65 | 30.27 | 6.39            | 81.64 | 24.20 |
| O <sub>3</sub> (ppb)                   | 7.55                    | 49.37 | 12.30 | 8.11        | 48.73 | 12.32 | 9.13        | 49.53 | 11.96 | 13.39           | 46.38 | 7.83  |
| PM <sub>10</sub> (μg/m <sup>3</sup> )  | 10.26                   | 39.44 | 6.29  | 10.29       | 39.24 | 6.32  | 10.14       | 41.90 | 6.36  | 10.73           | 39.80 | 4.42  |
| PM <sub>2.5</sub> (μg/m <sup>3</sup> ) | 4.60                    | 22.04 | 5.52  | 4.63        | 22.00 | 5.28  | 4.64        | 21.98 | 4.97  | 5.74            | 19.65 | 4.69  |
| SO <sub>2</sub> (ppb)                  | 0.80                    | 21.00 | 3.29  | 0.81        | 18.66 | 3.30  | 0.80        | 18.99 | 3.10  | 0.97            | 15.83 | 2.89  |

**Supplemental Table 2**

Spearman's correlation coefficients between pollutants over the whole pregnancy

|                   | CO    | NO <sub>x</sub> | O <sub>3</sub> | PM <sub>10</sub> | PM <sub>2.5</sub> | SO <sub>2</sub> |
|-------------------|-------|-----------------|----------------|------------------|-------------------|-----------------|
| CO                | 1     |                 |                |                  |                   |                 |
| NO <sub>x</sub>   | 0.60  | 1.00            |                |                  |                   |                 |
| O <sub>3</sub>    | -0.25 | -0.37           | 1.00           |                  |                   |                 |
| PM <sub>10</sub>  | 0.06  | 0.22            | -0.15          | 1.00             |                   |                 |
| PM <sub>2.5</sub> | 0.23  | 0.44            | -0.66          | 0.35             | 1.00              |                 |
| SO <sub>2</sub>   | 0.10  | 0.15            | -0.44          | -0.19            | 0.62              | 1.00            |

**Supplemental Table 3**Associations between criteria air pollutants and neonatal respiratory outcomes among all births ( $n = 233,375$ )

| Exposure windows        | Pollutants        | TTN <sup>†</sup> ( $n = 8007$ )<br>(RR, 95% CI) | Asphyxia <sup>†</sup> ( $n = 590$ )<br>(RR, 95% CI) | RDS <sup>†</sup> ( $n = 7325$ )<br>(RR, 95% CI) |
|-------------------------|-------------------|-------------------------------------------------|-----------------------------------------------------|-------------------------------------------------|
| 3 months' preconception | CO                | 0.96 (0.91, 1.02)                               | 1.15 (0.83, 1.58)                                   | <b>0.73 (0.68, 0.78)</b>                        |
|                         | NO <sub>x</sub>   | 1.06 (0.97, 1.16)                               | 1.22 (0.74, 1.99)                                   | <b>1.39 (1.25, 1.54)*</b>                       |
|                         | O <sub>3</sub>    | 0.97 (0.91, 1.04)                               | <b>1.76 (1.25, 2.48)*</b>                           | <b>1.09 (1.01, 1.18)*</b>                       |
|                         | PM <sub>10</sub>  | <b>1.10 (1.04, 1.17)*</b>                       | <b>0.77 (0.67, 0.89)</b>                            | 1.02 (0.96, 1.09)                               |
|                         | PM <sub>2.5</sub> | 1.01 (0.94, 1.10)                               | 1.80 (0.96, 3.35)                                   | <b>0.83 (0.76, 0.91)</b>                        |
|                         | SO <sub>2</sub>   | <b>0.84 (0.79, 0.90)</b>                        | <b>0.47 (0.30, 0.74)</b>                            | <b>0.76 (0.71, 0.82)</b>                        |
| Trimester 1             | CO                | 0.97 (0.91, 1.03)                               | 1.15 (0.83, 1.58)                                   | <b>0.72 (0.68, 0.78)</b>                        |
|                         | NO <sub>x</sub>   | 1.09 (1.00, 1.20)                               | 1.22 (0.70, 1.60)                                   | <b>1.42 (1.27, 1.58)*</b>                       |
|                         | O <sub>3</sub>    | 0.98 (0.91, 1.06)                               | <b>1.72 (1.32, 2.24)*</b>                           | <b>1.21 (1.12, 1.31)*</b>                       |
|                         | PM <sub>10</sub>  | <b>1.09 (1.03, 1.16)*</b>                       | <b>0.65 (0.52, 0.82)</b>                            | 1.00 (0.93, 1.06)                               |
|                         | PM <sub>2.5</sub> | 1.01 (0.93, 1.09)                               | <b>1.48 (1.09, 2.03)*</b>                           | 0.95 (0.87, 1.03)                               |
|                         | SO <sub>2</sub>   | <b>0.81 (0.76, 0.86)</b>                        | <b>0.61 (0.46, 0.81)</b>                            | <b>0.73 (0.68, 0.78)</b>                        |
| Trimester 2             | CO                | 1.05 (0.99, 1.12)                               | <b>1.32 (1.04, 1.67)*</b>                           | <b>0.74 (0.69, 0.79)</b>                        |
|                         | NO <sub>x</sub>   | 1.06 (0.97, 1.17)                               | 0.83 (0.55, 1.26)                                   | <b>1.33 (1.19, 1.49)*</b>                       |
|                         | O <sub>3</sub>    | 0.94 (0.87, 1.01)                               | <b>1.34 (1.03, 1.75)*</b>                           | <b>1.13 (1.04, 1.22)*</b>                       |
|                         | PM <sub>10</sub>  | 1.04 (0.99, 1.11)                               | <b>0.71 (0.56, 0.91)</b>                            | 1.06 (0.99, 1.13)                               |
|                         | PM <sub>2.5</sub> | 1.01 (0.93, 1.09)                               | 1.20 (0.86, 1.67)                                   | <b>0.90 (0.82, 0.97)</b>                        |
|                         | SO <sub>2</sub>   | <b>0.80 (0.75, 0.85)</b>                        | <b>0.68 (0.52, 0.89)</b>                            | <b>0.75 (0.70, 0.81)</b>                        |
| Whole pregnancy         | CO                | <b>1.10 (1.04, 1.16)*</b>                       | <b>1.28 (1.02, 1.61)*</b>                           | <b>0.75 (0.70, 0.80)</b>                        |
|                         | NO <sub>x</sub>   | 1.01 (0.93, 1.10)                               | 1.09 (0.73, 1.64)                                   | <b>1.40 (1.25, 1.56)*</b>                       |
|                         | O <sub>3</sub>    | 0.97 (0.89, 1.05)                               | <b>1.73 (1.24, 2.42)*</b>                           | <b>1.16 (1.05, 1.29)*</b>                       |
|                         | PM <sub>10</sub>  | 1.01 (0.95, 1.07)                               | <b>0.71 (0.57, 0.90)</b>                            | 1.02 (0.95, 1.09)                               |
|                         | PM <sub>2.5</sub> | <b>1.17 (1.05, 1.30)*</b>                       | <b>1.84 (1.17, 2.90)*</b>                           | 0.89 (0.79, 1.01)                               |
|                         | SO <sub>2</sub>   | <b>0.72 (0.67, 0.78)</b>                        | <b>0.47 (0.30, 0.68)</b>                            | <b>0.74 (0.69, 0.81)</b>                        |

Bold text indicates statistical significance.

\* Indicates a significant increase in risk of the neonatal respiratory outcomes.

<sup>†</sup> Multipollutant model adjusted for region, marital status, parity, maternal age, maternal race, caesarean delivery, type of insurance, maternal BMI, smoking/alcohol, comorbidities (HIV, hypertension, diabetes, thyroid disease), season of conception, and asthma.**Supplemental Table 4**Associations between criteria air pollutants and neonatal respiratory outcomes among term births ( $n = 197,255$ )

| Exposure windows        | Pollutants        | TTN <sup>†</sup> ( $n = 5211$ )<br>(RR, 95% CI) | Asphyxia <sup>†</sup> ( $n = 322$ )<br>(RR, 95% CI) | RDS <sup>†</sup> ( $n = 1266$ )<br>(RR, 95% CI) |
|-------------------------|-------------------|-------------------------------------------------|-----------------------------------------------------|-------------------------------------------------|
| 3 months' Preconception | CO                | 0.98 (0.91, 1.05)                               | 1.38 (1.00, 1.91)                                   | <b>0.54 (0.45, 0.64)</b>                        |
|                         | NO <sub>x</sub>   | 1.03 (0.92, 1.15)                               | 0.80 (0.45, 1.41)                                   | <b>1.96 (1.46, 2.63)*</b>                       |
|                         | O <sub>3</sub>    | 0.97 (0.89, 1.06)                               | <b>1.57 (1.15, 2.14)*</b>                           | <b>1.32 (1.07, 1.61)*</b>                       |
|                         | PM <sub>10</sub>  | <b>1.12 (1.04, 1.20)*</b>                       | 0.77 (0.56, 1.04)                                   | <b>0.81 (0.69, 0.96)</b>                        |
|                         | PM <sub>2.5</sub> | 1.06 (0.96, 1.17)                               | 0.97 (0.60, 1.56)                                   | 1.06 (0.85, 1.32)                               |
|                         | SO <sub>2</sub>   | <b>0.89 (0.82, 0.95)</b>                        | 0.92 (0.66, 1.30)                                   | <b>0.75 (0.62, 0.91)</b>                        |
| Trimester 1             | CO                | 1.00 (0.93, 1.08)                               | 1.28 (0.90, 1.83)                                   | <b>0.52 (0.44, 0.63)</b>                        |
|                         | NO <sub>x</sub>   | 1.07 (0.95, 1.21)                               | 0.80 (0.44, 1.46)                                   | <b>1.99 (1.47, 2.68)*</b>                       |
|                         | O <sub>3</sub>    | 1.00 (0.92, 1.10)                               | <b>2.21 (1.52, 3.21)*</b>                           | <b>1.38 (1.14, 1.67)*</b>                       |
|                         | PM <sub>10</sub>  | <b>1.11 (1.02, 1.19)*</b>                       | <b>0.67 (0.49, 0.92)</b>                            | <b>0.82 (0.69, 0.96)</b>                        |
|                         | PM <sub>2.5</sub> | 1.04 (0.94, 1.14)                               | <b>1.68 (1.11, 2.55)*</b>                           | 1.12 (0.91, 1.37)                               |
|                         | SO <sub>2</sub>   | <b>0.83 (0.77, 0.89)</b>                        | <b>0.65 (0.43, 0.99)</b>                            | <b>0.69 (0.58, 0.82)</b>                        |
| Trimester 2             | CO                | <b>1.12 (1.04, 1.21)*</b>                       | <b>1.59 (1.12, 2.24)*</b>                           | <b>0.54 (0.45, 0.66)</b>                        |
|                         | NO <sub>x</sub>   | 1.04 (0.92, 1.17)                               | 0.72 (0.40, 1.30)                                   | <b>1.82 (1.33, 2.49)*</b>                       |
|                         | O <sub>3</sub>    | 0.97 (0.88, 1.06)                               | <b>1.45 (1.01, 2.07)*</b>                           | 1.22 (1.00, 1.49)                               |
|                         | PM <sub>10</sub>  | 1.07 (0.99, 1.15)                               | <b>0.69 (0.50, 0.95)</b>                            | <b>0.81 (0.69, 0.95)</b>                        |
|                         | PM <sub>2.5</sub> | 1.05 (0.95, 1.16)                               | 1.10 (0.71, 1.70)                                   | 1.10 (0.90, 1.34)                               |
|                         | SO <sub>2</sub>   | <b>0.80 (0.74, 0.86)</b>                        | 0.67 (0.45, 1.00)                                   | <b>0.74 (0.62, 0.89)</b>                        |
| Whole pregnancy         | CO                | <b>1.17 (1.09, 1.25)*</b>                       | 1.41 (1.00, 1.99)                                   | <b>0.54 (0.45, 0.65)</b>                        |
|                         | NO <sub>x</sub>   | 1.00 (0.89, 1.12)                               | 1.00 (0.54, 1.82)                                   | <b>1.82 (1.35, 2.44)*</b>                       |
|                         | O <sub>3</sub>    | 1.06 (0.96, 1.17)                               | <b>2.97 (1.83, 4.85)*</b>                           | <b>1.32 (1.05, 1.65)*</b>                       |
|                         | PM <sub>10</sub>  | 1.04 (0.96, 1.12)                               | 0.93 (0.68, 1.27)                                   | 0.85 (0.71, 1.01)                               |
|                         | PM <sub>2.5</sub> | <b>1.29 (1.13, 1.47)*</b>                       | <b>1.93 (1.06, 3.54)*</b>                           | 1.23 (0.93, 1.64)                               |
|                         | SO <sub>2</sub>   | <b>0.70 (0.63, 0.76)</b>                        | <b>0.56 (0.35, 0.89)</b>                            | <b>0.70 (0.56, 0.86)</b>                        |

Bold text indicates statistical significance.

\* Indicates a significant increase in risk of the neonatal respiratory outcomes.

<sup>†</sup> Multipollutant model adjusted for region, marital status, parity, maternal age, maternal race, caesarean delivery, type of insurance, maternal BMI, smoking/alcohol, comorbidities (HIV, hypertension, diabetes, thyroid disease), season of conception, and asthma. Relative risks are estimated for an IQR increase in pollutants.

**Supplemental Table 5**Associations between criteria air pollutants and neonatal respiratory outcomes with adjustment for pregnancy complications ( $n = 233,375$ )

| Exposure windows        | Pollutants        | TTN <sup>†</sup> ( $n = 8007$ )<br>(RR, 95% CI) | Asphyxia <sup>†</sup> ( $n = 590$ )<br>(RR, 95% CI) | RDS <sup>†</sup> ( $n = 7325$ )<br>(RR, 95% CI) |
|-------------------------|-------------------|-------------------------------------------------|-----------------------------------------------------|-------------------------------------------------|
| 3 months' preconception | CO                | 0.96 (0.91, 1.02)                               | 1.22 (0.94, 1.57)                                   | <b>0.73 (0.68, 0.78)</b>                        |
|                         | NO <sub>x</sub>   | 1.06 (0.97, 1.16)                               | 0.92 (0.62, 1.38)                                   | <b>1.37 (1.23, 1.52)*</b>                       |
|                         | O <sub>3</sub>    | 0.97 (0.90, 1.04)                               | <b>1.48 (1.14, 1.91)*</b>                           | 1.08 (0.99, 1.17)                               |
|                         | PM <sub>10</sub>  | <b>1.11 (1.05, 1.18)*</b>                       | <b>0.70 (0.56, 0.89)</b>                            | 1.05 (0.98, 1.12)                               |
|                         | PM <sub>2.5</sub> | 1.01 (0.93, 1.10)                               | 1.19 (0.84, 1.69)                                   | <b>0.82 (0.75, 0.90)</b>                        |
|                         | SO <sub>2</sub>   | <b>0.83 (0.78, 0.89)</b>                        | 0.75 (0.56, 1.02)                                   | <b>0.74 (0.69, 0.80)</b>                        |
| Trimester 1             | CO                | 0.97 (0.91, 1.03)                               | 1.16 (0.89, 1.50)                                   | <b>0.73 (0.68, 0.78)</b>                        |
|                         | NO <sub>x</sub>   | 1.09 (0.99, 1.20)                               | 0.98 (0.64, 1.52)                                   | <b>1.40 (1.25, 1.56)*</b>                       |
|                         | O <sub>3</sub>    | 0.98 (0.91, 1.05)                               | <b>1.83 (1.40, 2.39)*</b>                           | <b>1.19 (1.10, 1.28)*</b>                       |
|                         | PM <sub>10</sub>  | <b>1.10 (1.03, 1.17)*</b>                       | <b>0.66 (0.52, 0.83)</b>                            | 1.01 (0.95, 1.08)                               |
|                         | PM <sub>2.5</sub> | 1.01 (0.93, 1.09)                               | <b>1.52 (1.11, 2.09)*</b>                           | 0.94 (0.87, 1.03)                               |
|                         | SO <sub>2</sub>   | <b>0.81 (0.76, 0.86)</b>                        | <b>0.61 (0.45, 0.82)</b>                            | <b>0.71 (0.66, 0.77)</b>                        |
| Trimester 2             | CO                | 1.05 (0.99, 1.12)                               | <b>1.37 (1.07, 1.76)*</b>                           | <b>0.74 (0.69, 0.79)</b>                        |
|                         | NO <sub>x</sub>   | 1.07 (0.97, 1.17)                               | 0.8 (0.52, 1.23)                                    | <b>1.32 (1.18, 1.47)*</b>                       |
|                         | O <sub>3</sub>    | 0.94 (0.87, 1.01)                               | <b>1.33 (1.01, 1.74)*</b>                           | <b>1.11 (1.03, 1.21)*</b>                       |
|                         | PM <sub>10</sub>  | 1.05 (0.99, 1.11)                               | <b>0.71 (0.55, 0.92)</b>                            | <b>1.08 (1.01, 1.15)*</b>                       |
|                         | PM <sub>2.5</sub> | 1.00 (0.93, 1.08)                               | 1.21 (0.86, 1.71)                                   | <b>0.88 (0.81, 0.96)</b>                        |
|                         | SO <sub>2</sub>   | <b>0.79 (0.74, 0.84)</b>                        | <b>0.67 (0.51, 0.89)</b>                            | <b>0.73 (0.68, 0.78)</b>                        |
| Whole pregnancy         | CO                | <b>1.10 (1.04, 1.16)*</b>                       | <b>1.33 (1.05, 1.68)*</b>                           | <b>0.76 (0.71, 0.81)</b>                        |
|                         | NO <sub>x</sub>   | 1.01 (0.93, 1.10)                               | 1.05 (0.69, 1.59)                                   | <b>1.38 (1.24, 1.53)*</b>                       |
|                         | O <sub>3</sub>    | 0.97 (0.89, 1.05)                               | <b>1.82 (1.29, 2.55)*</b>                           | <b>1.15 (1.04, 1.27)*</b>                       |
|                         | PM <sub>10</sub>  | 1.01 (0.95, 1.07)                               | <b>0.73 (0.58, 0.92)</b>                            | 1.04 (0.96, 1.11)                               |
|                         | PM <sub>2.5</sub> | <b>1.17 (1.05, 1.29)*</b>                       | <b>1.91 (1.20, 3.03)*</b>                           | 0.89 (0.78, 1.00)                               |
|                         | SO <sub>2</sub>   | <b>0.71 (0.66, 0.77)</b>                        | <b>0.50 (0.36, 0.68)</b>                            | <b>0.72 (0.66, 0.78)</b>                        |

Bold text indicates statistical significance.

\* Indicates a significant increase in risk of the neonatal respiratory outcomes.

† Multipollutant model adjusted for region, marital status, parity, maternal age, maternal race, caesarean delivery, type of insurance, maternal BMI, smoking/alcohol, comorbidities (HIV, hypertension, diabetes, thyroid disease), season of conception, asthma, gestational diabetes mellitus (GDM), and hypertension (gestational hypertension, preeclampsia, and eclampsia). Relative risks are estimated for an IQR increase in pollutants.

**Supplemental Table 6**Associations between criteria air pollutants and neonatal respiratory outcomes with the Benjamini-Hochberg adjusted  $p$ -values ( $n = 233,375$ )

|                         |                   | TTN <sup>†</sup> ( $n = 8007$ )<br>(RR, 95% CI) | FDR    | Asphyxia <sup>†</sup> ( $n = 590$ )<br>(RR, 95% CI) | FDR    | RDS <sup>†</sup> ( $n = 7325$ )<br>(RR, 95% CI) | FDR    |
|-------------------------|-------------------|-------------------------------------------------|--------|-----------------------------------------------------|--------|-------------------------------------------------|--------|
| 3 months' preconception | CO                | 0.96 (0.91, 1.02)                               | <.0001 | 1.14 (0.89, 1.46)                                   | 0.015  | <b>0.73 (0.68, 0.78)</b>                        | <.0001 |
|                         | NO <sub>x</sub>   | 1.06 (0.97, 1.16)                               | <.0001 | 0.94 (0.63, 1.4)                                    | <.0001 | <b>1.39 (1.25, 1.54)*</b>                       | <.0001 |
|                         | O <sub>3</sub>    | 0.97 (0.91, 1.04)                               | <.0001 | <b>1.43 (1.11, 1.84)*</b>                           | <.0001 | <b>1.09 (1.01, 1.18)*</b>                       | 0.6737 |
|                         | PM <sub>10</sub>  | <b>1.10 (1.04, 1.17)*</b>                       | <.0001 | <b>0.72 (0.57, 0.90)</b>                            | 0.0527 | 1.02 (0.96, 1.09)                               | <.0001 |
|                         | PM <sub>2.5</sub> | 1.01 (0.94, 1.1)                                | <.0001 | 1.19 (0.84, 1.68)                                   | <.0001 | <b>0.83 (0.76, 0.91)</b>                        | <.0001 |
|                         | SO <sub>2</sub>   | <b>0.84 (0.79, 0.90)</b>                        | 0.0716 | <b>0.73 (0.55, 0.99)</b>                            | <.0001 | <b>0.76 (0.71, 0.82)</b>                        | <.0001 |
| Trimester 1             | CO                | 0.97 (0.91, 1.03)                               | <.0001 | 1.11 (0.87, 1.42)                                   | 0.07   | <b>0.72 (0.67, 0.77)</b>                        | <.0001 |
|                         | NO <sub>x</sub>   | 1.09 (1.00, 1.2)                                | <.0001 | 1.06 (0.70, 1.60)                                   | <.0001 | <b>1.42 (1.27, 1.58)*</b>                       | <.0001 |
|                         | O <sub>3</sub>    | 0.98 (0.91, 1.06)                               | <.0001 | <b>1.72 (1.32, 2.24)*</b>                           | <.0001 | <b>1.21 (1.12, 1.30)*</b>                       | <.0001 |
|                         | PM <sub>10</sub>  | <b>1.09 (1.03, 1.16)*</b>                       | 0.083  | <b>0.65 (0.52, 0.82)</b>                            | 0.0835 | 1 (0.93, 1.06)                                  | 0.0173 |
|                         | PM <sub>2.5</sub> | 1.01 (0.93, 1.09)                               | <.0001 | <b>1.48 (1.09, 2.03)*</b>                           | <.0001 | 0.95 (0.87, 1.03)                               | <.0001 |
|                         | SO <sub>2</sub>   | <b>0.81 (0.76, 0.86)</b>                        | 0.3729 | <b>0.61 (0.46, 0.81)</b>                            | <.0001 | <b>0.73 (0.68, 0.78)</b>                        | <.0001 |
| Trimester 2             | CO                | 1.06 (0.99, 1.12)                               | <.0001 | <b>1.32 (1.04, 1.67)*</b>                           | 0.281  | <b>0.73 (0.68, 0.79)</b>                        | <.0001 |
|                         | NO <sub>x</sub>   | 1.06 (0.97, 1.17)                               | <.0001 | 0.83 (0.55, 1.26)                                   | <.0001 | <b>1.33 (1.19, 1.49)*</b>                       | <.0001 |
|                         | O <sub>3</sub>    | 0.94 (0.87, 1.01)                               | <.0001 | <b>1.34 (1.03, 1.75)*</b>                           | <.0001 | <b>1.13 (1.04, 1.22)*</b>                       | <.0001 |
|                         | PM <sub>10</sub>  | 1.04 (0.99, 1.11)                               | 0.0106 | <b>0.71 (0.56, 0.91)</b>                            | 0.056  | 1.06 (0.99, 1.13)                               | 0.0273 |
|                         | PM <sub>2.5</sub> | 1.01 (0.93, 1.09)                               | <.0001 | 1.2 (0.86, 1.67)                                    | <.0001 | <b>0.90 (0.82, 0.97)</b>                        | <.0001 |
|                         | SO <sub>2</sub>   | <b>0.80 (0.75, 0.85)</b>                        | 0.0137 | <b>0.68 (0.52, 0.89)</b>                            | <.0001 | <b>0.75 (0.70, 0.81)</b>                        | <.0001 |
| Whole pregnancy         | CO                | <b>1.10 (1.04, 1.16)*</b>                       | <.0001 | <b>1.28 (1.02, 1.61)*</b>                           | 0.103  | <b>0.75 (0.70, 0.80)</b>                        | <.0001 |
|                         | NO <sub>x</sub>   | 1.01 (0.93, 1.1)                                | <.0001 | 1.09 (0.73, 1.64)                                   | <.0001 | <b>1.40 (1.26, 1.56)*</b>                       | <.0001 |
|                         | O <sub>3</sub>    | 0.97 (0.89, 1.05)                               | <.0001 | <b>1.73 (1.24, 2.42)*</b>                           | <.0001 | <b>1.16 (1.05, 1.29)*</b>                       | <.0001 |
|                         | PM <sub>10</sub>  | 1.01 (0.95, 1.07)                               | 0.0012 | <b>0.71 (0.57, 0.9)</b>                             | 0.0631 | 1.02 (0.95, 1.09)                               | 0.9384 |
|                         | PM <sub>2.5</sub> | <b>1.17 (1.05, 1.30)*</b>                       | <.0001 | <b>1.84 (1.17, 2.9)*</b>                            | <.0001 | 0.89 (0.79, 1.01)                               | <.0001 |
|                         | SO <sub>2</sub>   | <b>0.72 (0.67, 0.77)</b>                        | 0.0208 | <b>0.5 (0.37, 0.68)*</b>                            | <.0001 | <b>0.74 (0.69, 0.81)</b>                        | <.0001 |

Bolded-italics indicate when the relative risks remain significant after the Benjamini-Hochberg procedure.

Bold text indicates statistical significance.

\* Indicates when the increased risks remain significant after the Benjamini-Hochberg procedure.

† Multipollutant model adjusted for region, marital status, parity, maternal age, maternal race, caesarean delivery, type of insurance, maternal BMI, smoking/alcohol, comorbidities (HIV, hypertension, diabetes, thyroid disease), season of conception, and asthma.

**Supplemental Table 7**

Associations between whole-pregnancy exposures criteria air pollutants and neonatal respiratory outcomes

| Gestational age categories                       | Pollutants        | TTN ( <i>n</i> = 8007) <sup>†</sup><br>(RR, 95% CI) | Asphyxia ( <i>n</i> = 590) <sup>†</sup><br>(RR, 95% CI) | RDS ( <i>n</i> = 7328) <sup>†</sup><br>(RR, 95% CI) |
|--------------------------------------------------|-------------------|-----------------------------------------------------|---------------------------------------------------------|-----------------------------------------------------|
| Early preterm (gestational weeks 23–34)          |                   | ( <i>n</i> = 1467, 18.3%)                           | ( <i>n</i> = 187, 31.7%)                                | ( <i>n</i> = 5027, 68.6%)                           |
|                                                  | CO                | 1.04 (0.98, 1.10)                                   | 1.25 (0.99, 1.58)                                       | <b>0.71 (0.66, 0.76)</b>                            |
|                                                  | NO <sub>x</sub>   | 1.07 (0.97, 1.18)                                   | 0.99 (0.64, 1.51)                                       | <b>1.45 (1.29, 1.62)*</b>                           |
|                                                  | O <sub>3</sub>    | 0.99 (0.91, 1.07)                                   | <b>1.72 (1.32, 2.26)*</b>                               | <b>1.24 (1.14, 1.34)*</b>                           |
|                                                  | PM <sub>10</sub>  | 1.05 (0.99, 1.11)                                   | <b>0.69 (0.55, 0.87)</b>                                | 1.06 (0.99, 1.13)                                   |
|                                                  | PM <sub>2.5</sub> | 1.08 (0.99, 1.18)                                   | <b>1.65 (1.10, 2.47)*</b>                               | <b>0.90 (0.81, 0.99)</b>                            |
| Preterm and early term (gestational weeks 35–38) |                   | ( <i>n</i> = 3374, 42.1%)                           | ( <i>n</i> = 212, 35.9%)                                | ( <i>n</i> = 1678, 22.9%)                           |
|                                                  | CO                | <b>1.11 (1.04, 1.18)*</b>                           | <b>1.44 (1.09, 1.91)*</b>                               | <b>0.66 (0.58, 0.75)</b>                            |
|                                                  | NO <sub>x</sub>   | 1.02 (0.93, 1.13)                                   | 1.08 (0.66, 1.78)                                       | <b>1.55 (1.27, 1.90)*</b>                           |
|                                                  | O <sub>3</sub>    | 1.03 (0.94, 1.12)                                   | <b>2.42 (1.63, 3.61)*</b>                               | <b>1.28 (1.11, 1.49)*</b>                           |
|                                                  | PM <sub>10</sub>  | 1.05 (0.99, 1.13)                                   | 0.84 (0.64, 1.10)                                       | 1.00 (0.89, 1.13)                                   |
|                                                  | PM <sub>2.5</sub> | <b>1.14 (1.02, 1.28)*</b>                           | 1.66 (0.99, 2.77)                                       | 1.02 (0.84, 1.24)                                   |
| Term (gestational weeks 38–42)                   |                   | ( <i>n</i> = 3166, 39.5%)                           | ( <i>n</i> = 191, 32.4%)                                | ( <i>n</i> = 623, 8.5%)                             |
|                                                  | CO                | <b>1.18 (1.07, 1.29)*</b>                           | N/A <sup>‡</sup>                                        | <b>0.58 (0.43, 0.77)</b>                            |
|                                                  | NO <sub>x</sub>   | 0.96 (0.83, 1.12)                                   | N/A <sup>‡</sup>                                        | <b>1.94 (1.26, 3.00)*</b>                           |
|                                                  | O <sub>3</sub>    | 1.02 (0.89, 1.18)                                   | N/A <sup>‡</sup>                                        | 1.13 (0.79, 1.61)                                   |
|                                                  | PM <sub>10</sub>  | <b>1.14 (1.03, 1.27)*</b>                           | N/A <sup>‡</sup>                                        | <b>0.62 (0.45, 0.84)</b>                            |
|                                                  | PM <sub>2.5</sub> | 1.19 (1.00, 1.43)                                   | N/A <sup>‡</sup>                                        | 1.40 (0.88, 2.23)                                   |
|                                                  | SO <sub>2</sub>   | <b>0.68 (0.60, 0.78)</b>                            | N/A <sup>‡</sup>                                        | <b>0.48 (0.34, 0.69)</b>                            |

Whole pregnancy length was truncated among ongoing pregnancy during each window to ensure equal length of exposure.

Bold text indicates statistical significance.

\* Indicates a significant increase in risk of the neonatal respiratory outcomes.

† Multipollutant model adjusted for region, marital status, parity, maternal age, maternal race, caesarean delivery, type of insurance, maternal BMI, smoking/alcohol, comorbidities (HIV, hypertension, diabetes, thyroid disease), season of conception, and asthma. Relative risks are estimated for an IQR increase in pollutants.

‡ Term asphyxia was not assessed due to an insufficient number of cases.
